# Supplementary material for: Boride-induced phase tuning of defect-introduced MoS2 nanosheets to boost the electrocatalytic hydrogen evolution reaction
Source: Royal Society of Chemistry journal article supplement (doi:10.1039/d3ta05076a), 2023-01-01
Supplement: d3ta05076a1.pdf [file d3ta05076a1.pdf]

## Supplementary information

for

### **Boride-induced phase tuning of defect-introduced MoS<sub>2</sub> nanosheets to boost electrocatalytic hydrogen evolution reaction**

Dong Wook Lee,<sup>‡</sup> Xiaoyan Jin,<sup>‡\*</sup> So Yeon Yun, and Seong-Ju Hwang\*

Department of Materials Science and Engineering, Yonsei University, Seoul 03722, Republic of Korea.

<sup>‡</sup>These authors contributed equally to this work.

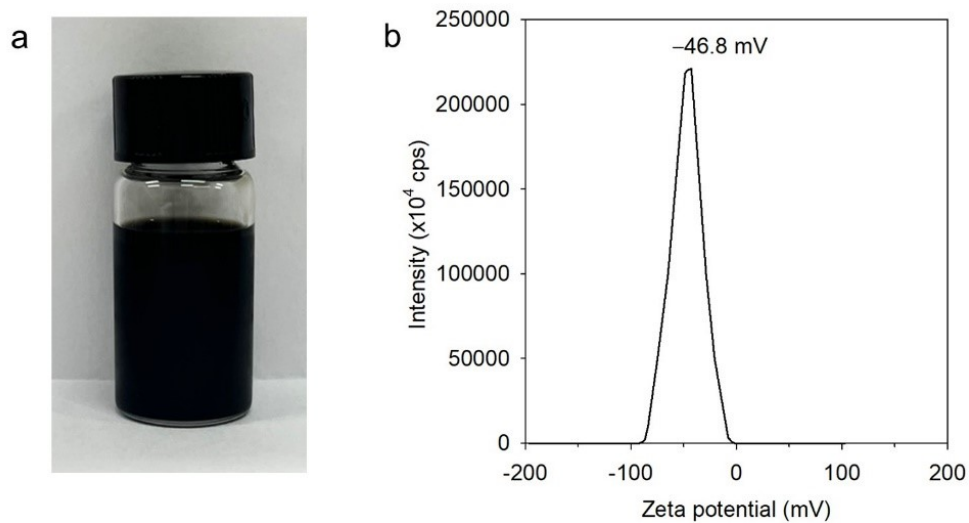

**Fig. S1.** (a) Photoimage of colloidal suspension and (b) zeta potential data of exfoliated MoS<sub>2</sub> nanosheets.

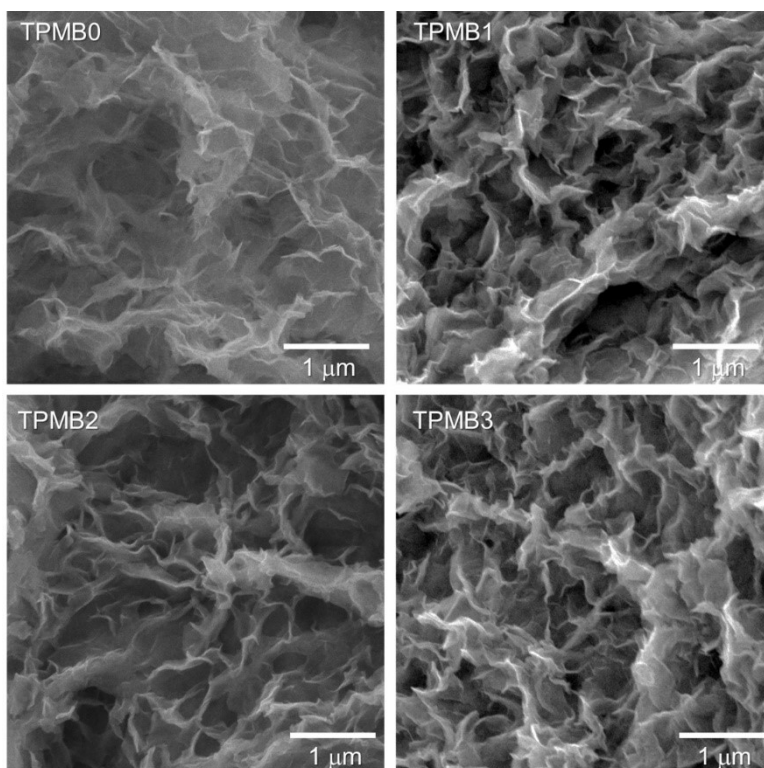

**Fig. S2.** Field emission-scanning electron microscopy (FE-SEM) images of TPMB materials.

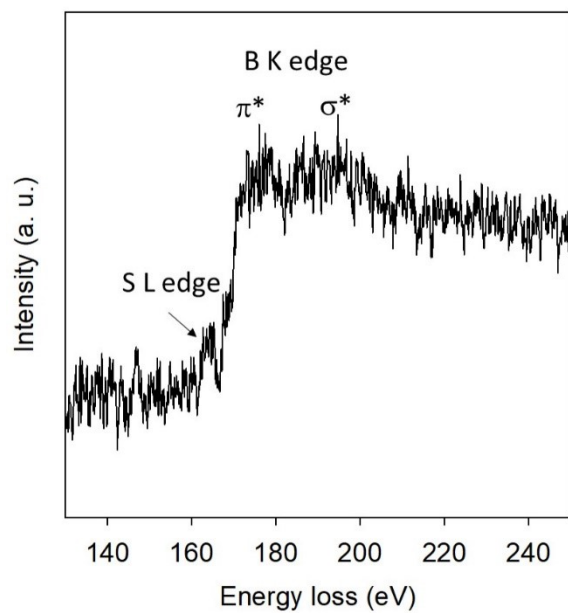

**Fig. S3.** Electron energy loss spectroscopy (EELS) data of TPMB3 material.

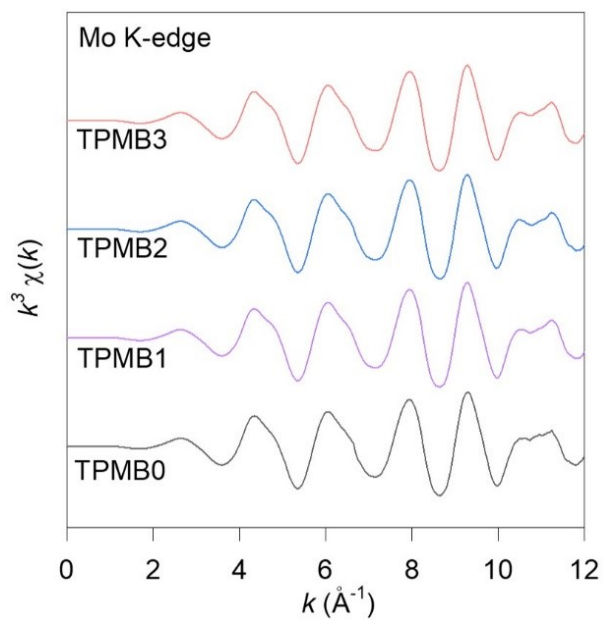

**Fig. S4.**  $k^3$ -weighted Mo K-edge extended X-ray absorption fine structure (EXAFS) data of TPMB materials.

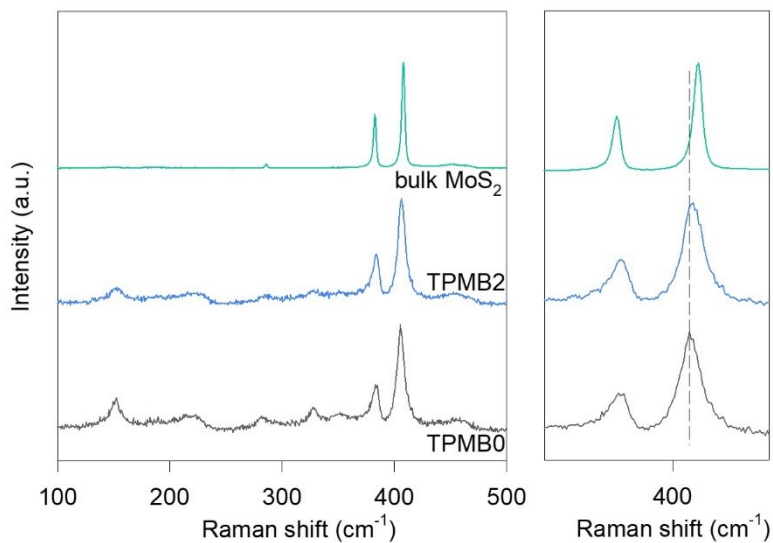

**Fig. S5.** Micro-Raman data of TPMB materials.

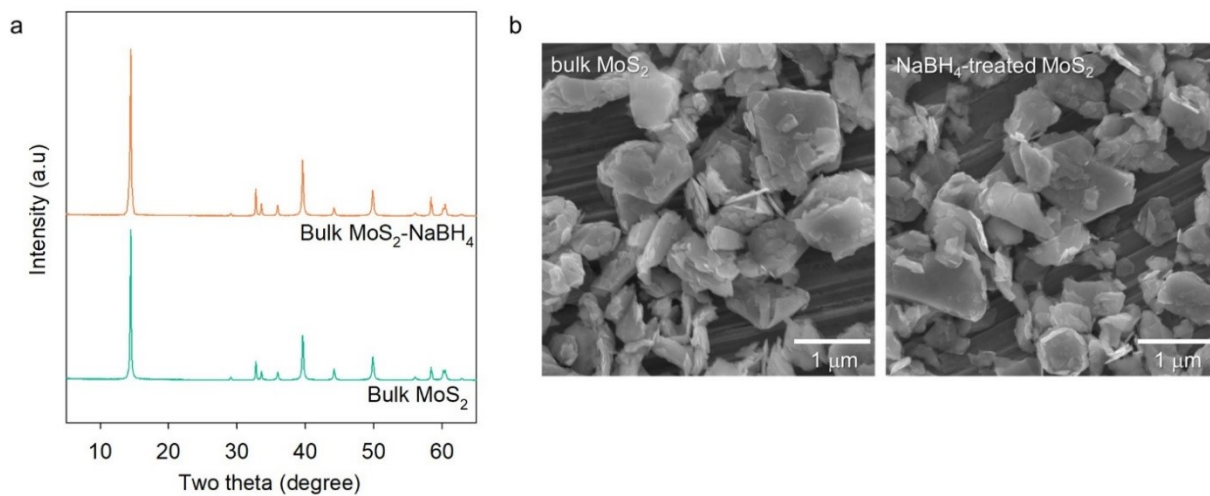

**Fig. S6.** (a) Powder X-ray diffraction (XRD) images and (b) FE-SEM images of  $\text{NaBH}_4$ -treated bulk  $\text{MoS}_2$ .

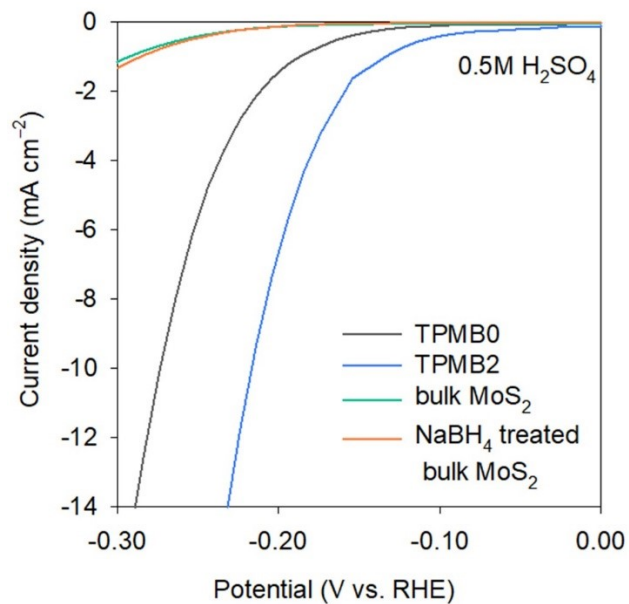

**Fig. S7.** Linear sweep voltammetry (LSV) curves of NaBH<sub>4</sub>-treated bulk MoS<sub>2</sub>.

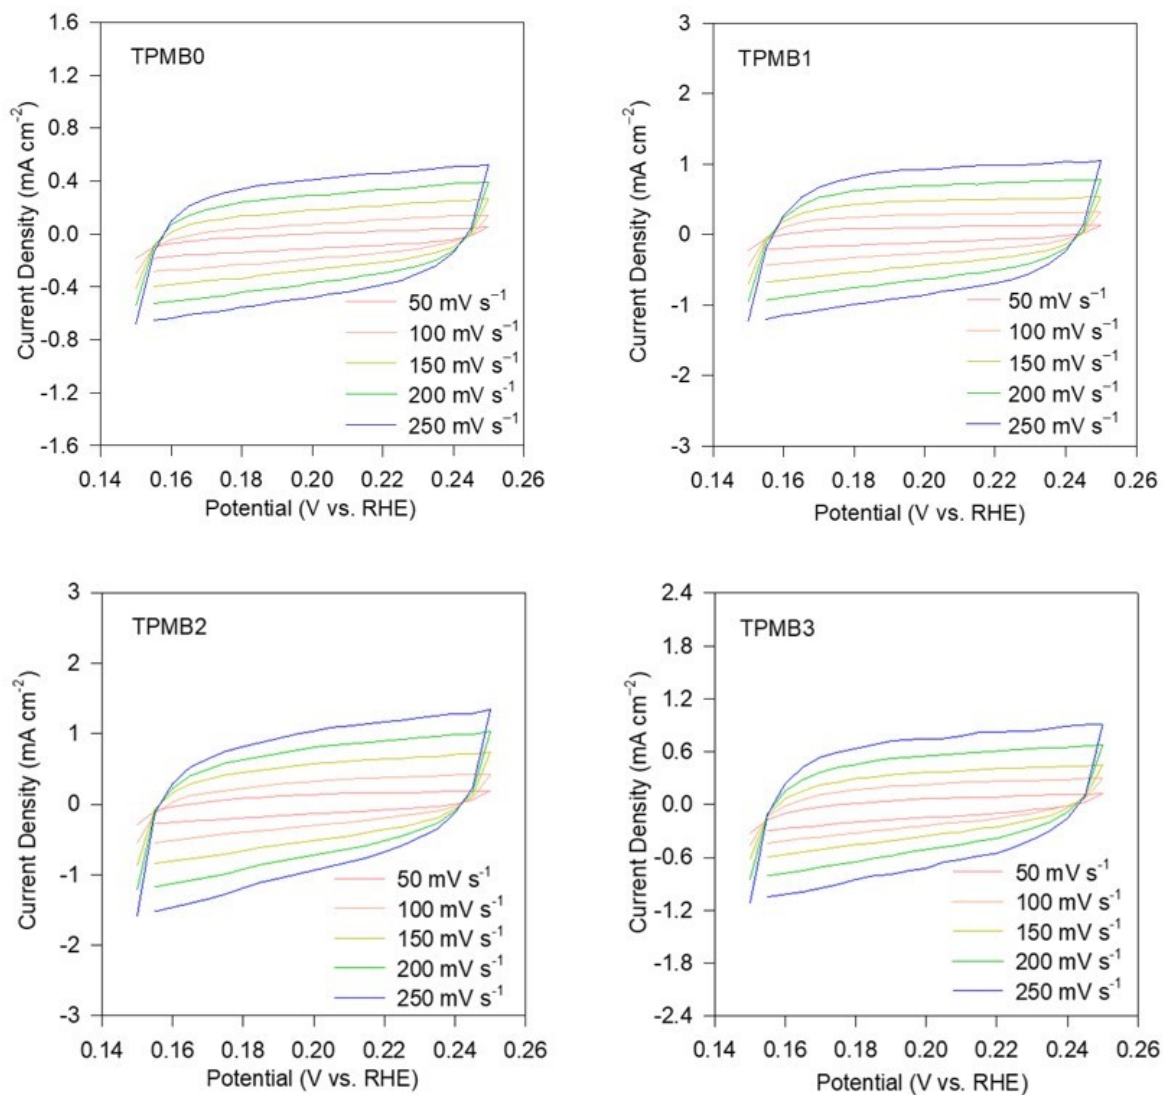

**Fig. S8.** Cyclic voltammetry (CV) curves measured at various scan rates of TPMB materials.

**Table S1.** Results of non-linear least-squares Mo K-edge EXAFS fitting analysis.

| Material | Bonding pair | Coordination number | Bond distance (Å) | $\Delta E$ (eV) | $\sigma^2$ ( $10^{-3} \times \text{Å}^2$ ) |
|----------|--------------|---------------------|-------------------|-----------------|--------------------------------------------|
| TPMB0    | Mo–S         | 6                   | 2.406             | –0.73           | 3.80                                       |
|          | Mo–Mo        | 2                   | 2.867             | 1.09            | 9.74                                       |
|          | Mo–Mo        | 2                   | 3.208             | 1.00            | 7.87                                       |
| TPMB1    | Mo–S         | 6                   | 2.406             | –0.47           | 3.67                                       |
|          | Mo–Mo        | 2                   | 2.893             | 3.87            | 10.13                                      |
|          | Mo–Mo        | 2                   | 3.183             | 1.22            | 7.74                                       |
| TPMB2    | Mo–S         | 6                   | 2.406             | –0.48           | 4.04                                       |
|          | Mo–Mo        | 2                   | 2.891             | 2.14            | 6.24                                       |
|          | Mo–Mo        | 2                   | 3.186             | 1.28            | 3.00                                       |
| TPMB3    | Mo–S         | 6                   | 2.406             | –0.40           | 3.53                                       |
|          | Mo–Mo        | 2                   | 2.893             | 3.07            | 9.90                                       |
|          | Mo–Mo        | 2                   | 3.186             | 1.99            | 6.83                                       |
